# Supplementary material for: Genomic analysis of Salmonella enterica serotype Paratyphi A during an outbreak in Cambodia, 2013–2015
Source: PubMed Central journal article supplement (PMC5320704; doi:10.1099/mgen.0.000092), 2016-11-30
Supplement: mgen-02-92-s001.pdf [file mgen-02-92-s001.pdf]

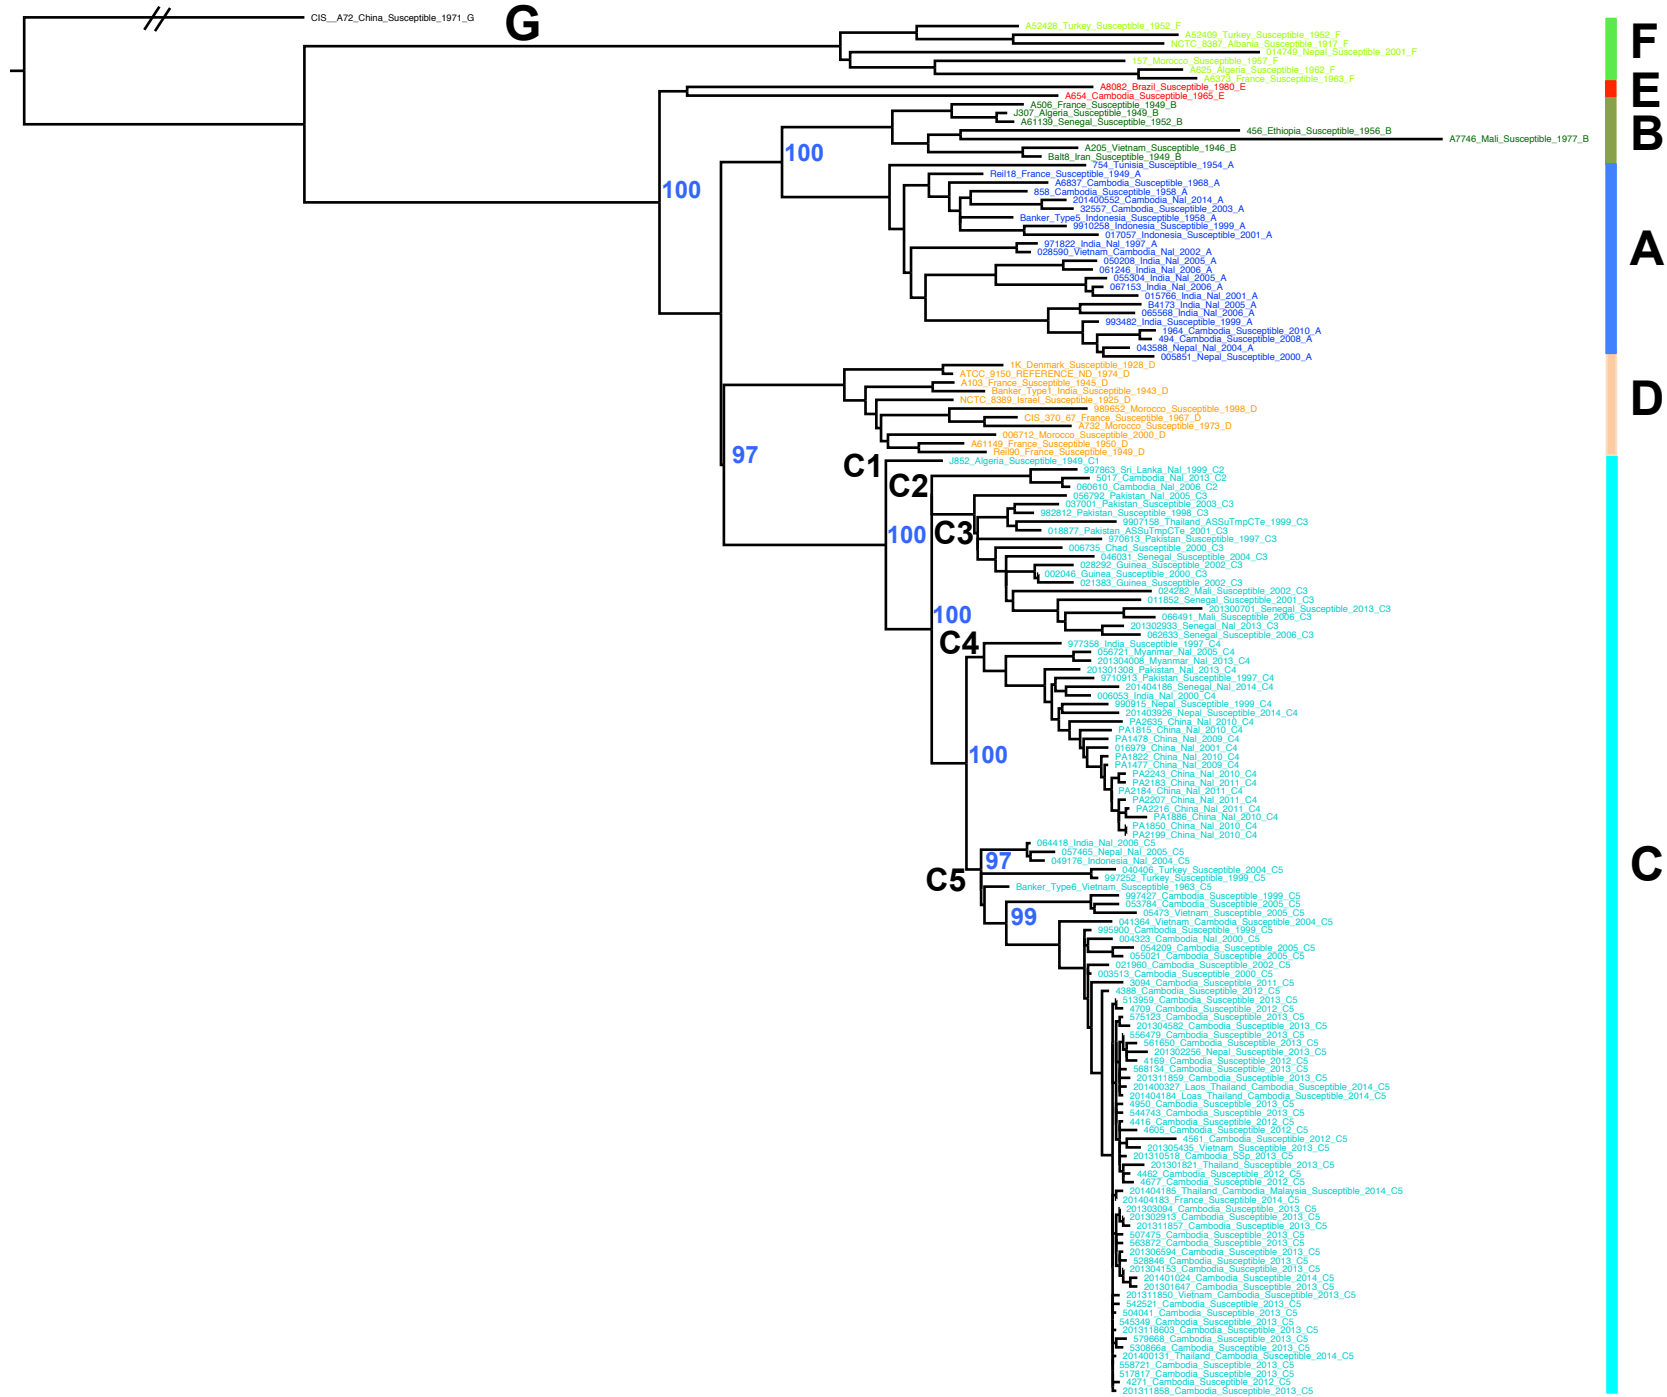

Supplementary Figure 1

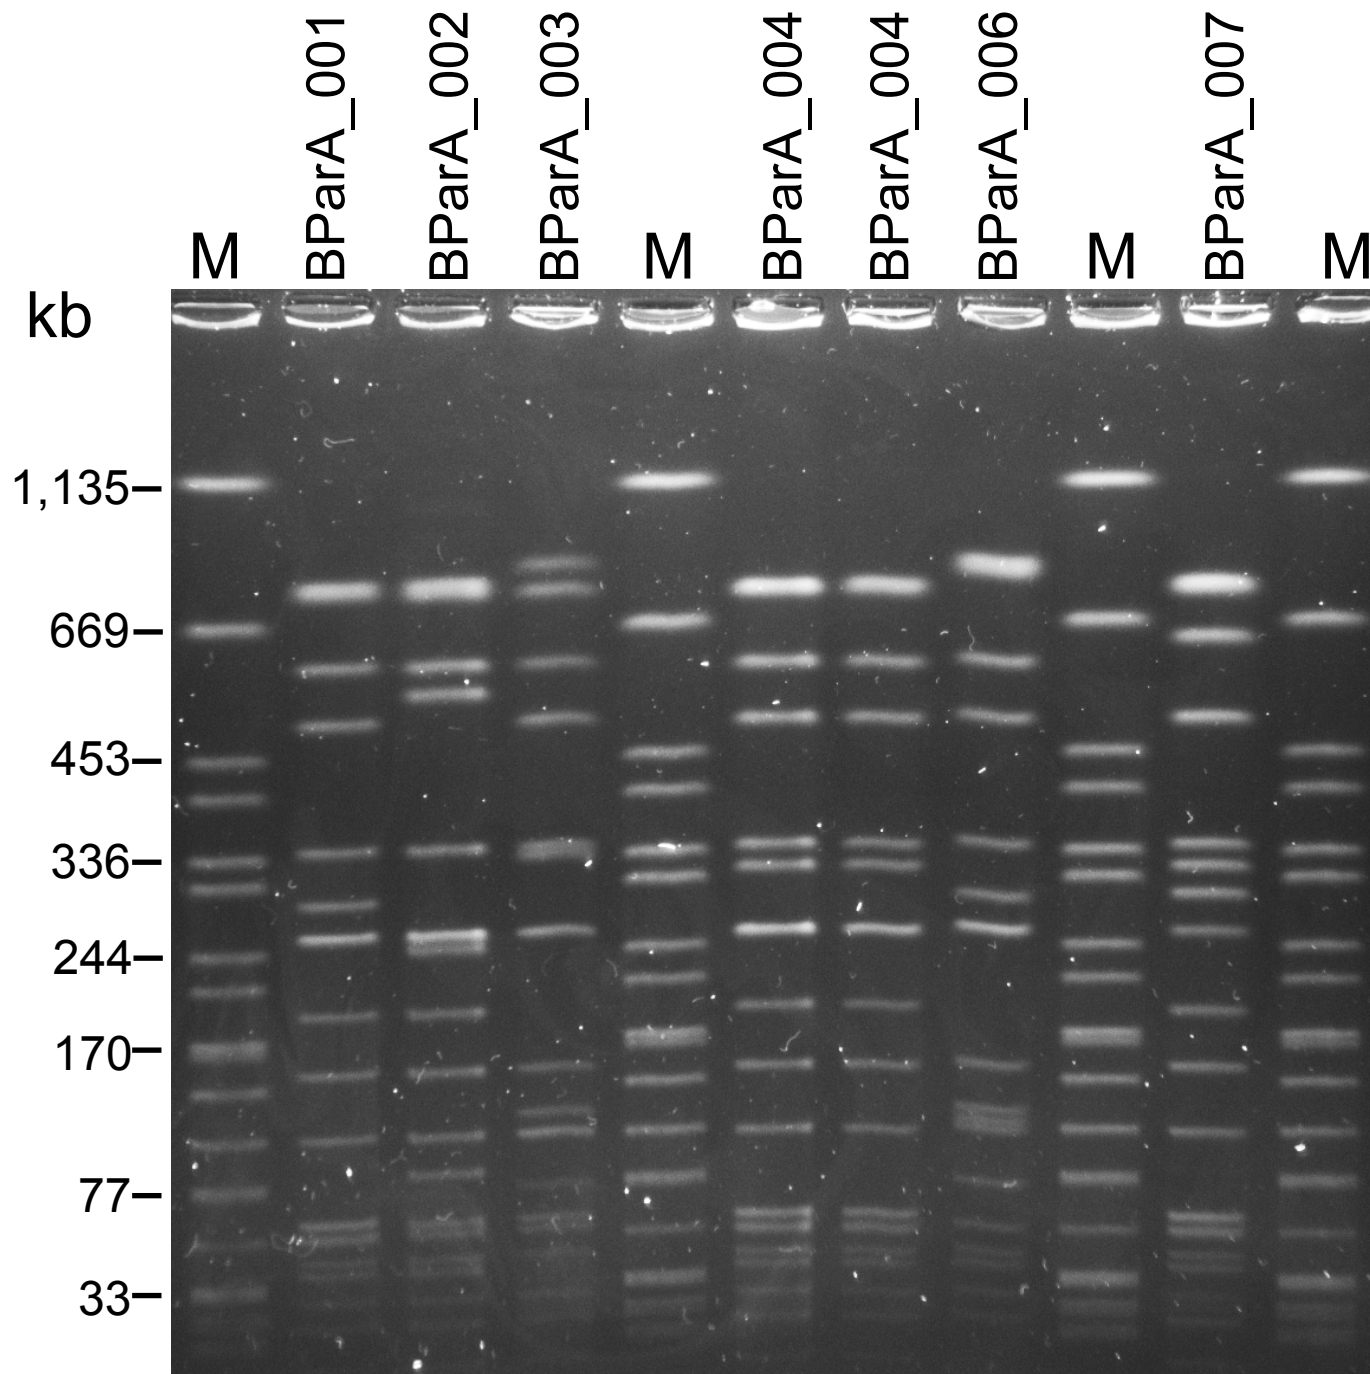

Supplementary Figure 2

**a**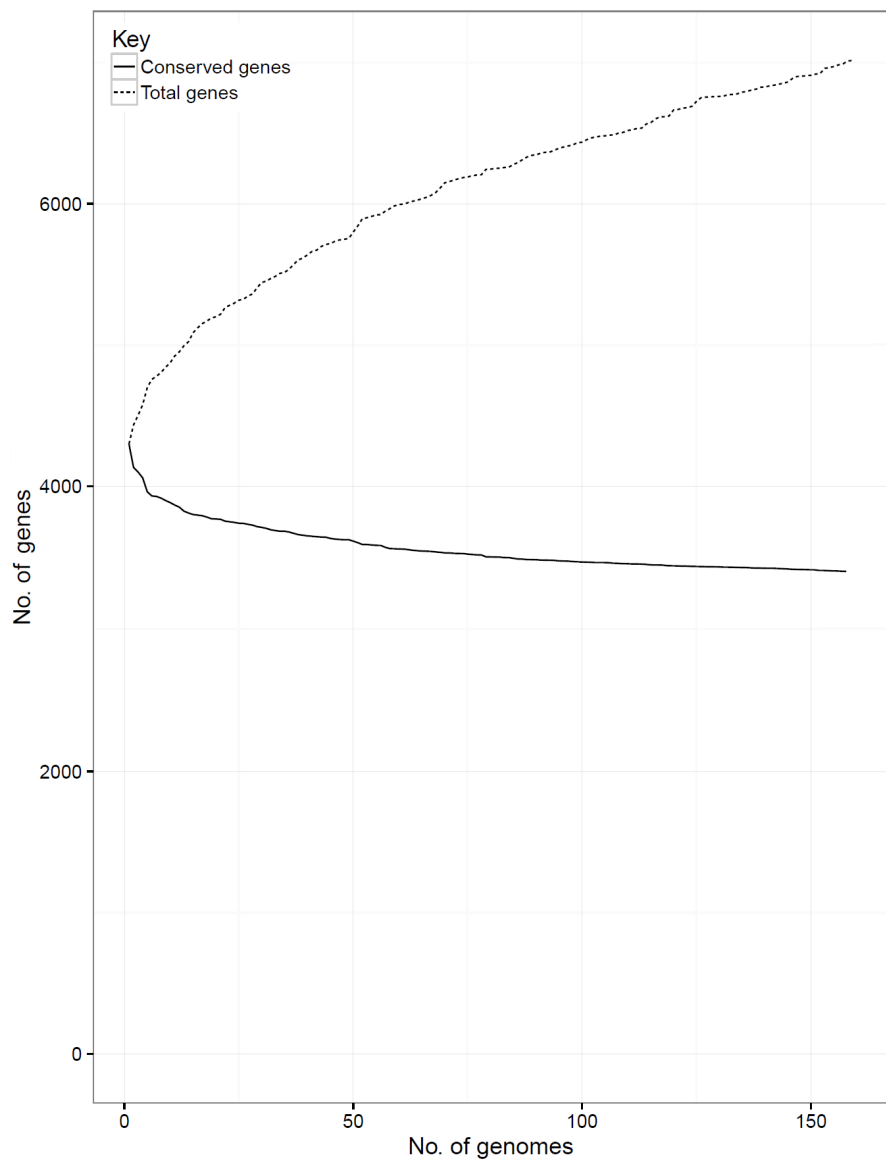**b**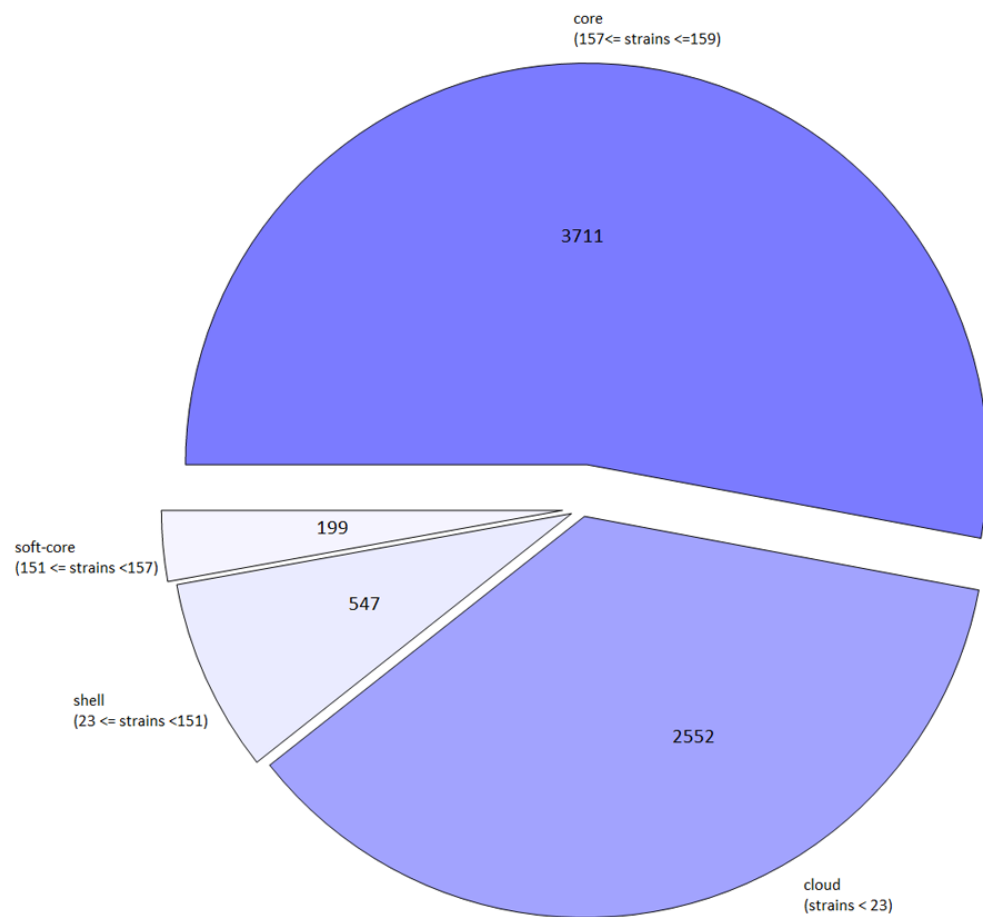

Supplementary Figure 3
